# Supplementary material for: High O2 tolerant metal-based catalysts for selective H2O2 reduction by constructing an ultra-thin oxide passivation layer
Source: Royal Society of Chemistry journal article supplement (doi:10.1039/d5mh00716j), 2025-01-01
Supplement: d5mh00716j1.pdf [file d5mh00716j1.pdf]

## Supplementary Information

### **High O<sub>2</sub> Tolerant Metal-based Catalysts for Selective H<sub>2</sub>O<sub>2</sub> Reduction by Constructing an Ultra-thin Oxide Passivation Layer**

Yaolan Li,<sup>a</sup> Zhenyao Ding,<sup>a</sup> Yifan Zhou,<sup>a</sup> Zhiping Liu,<sup>a</sup> Lihui Huang,<sup>a</sup> Liping Chen,<sup>\*a</sup> and Xinjian Feng<sup>\*a</sup>

<sup>a</sup> *State Key Laboratory of Bioinspired Interfacial Materials Science, College of Chemistry, Chemical Engineering and Materials Science, Soochow University, Suzhou 215123, P. R. China.*

*E-mail:* [xjfeng@suda.edu.cn](mailto:xjfeng@suda.edu.cn); [lpchen@suda.edu.cn](mailto:lpchen@suda.edu.cn)

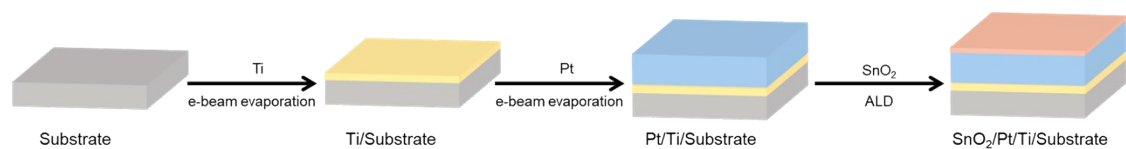

**Figure S1.** The detail preparation process of Pt/SnO<sub>2</sub>.

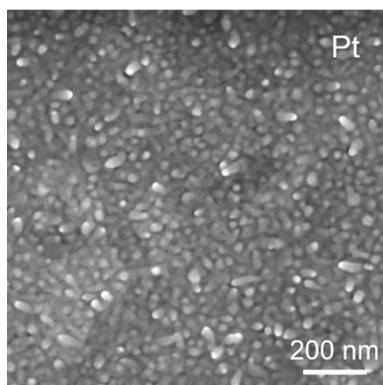

**Figure S2.** SEM image of the bare Pt catalyst before SnO<sub>2</sub> modification.

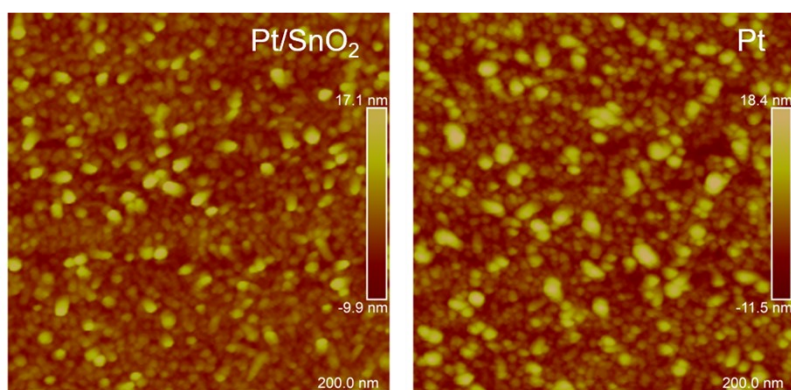

**Figure S3.** AFM image of the Pt/SnO<sub>2</sub> and bare Pt catalyst.

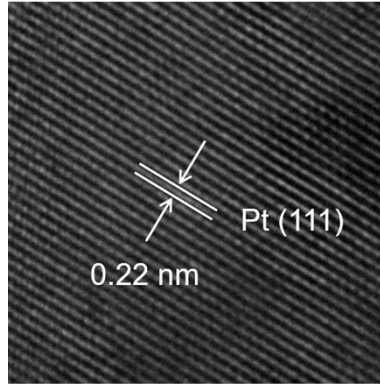

**Figure S4.** High-resolution TEM image of crystalline Pt. The observed lattice spacing of 0.22 nm corresponded to the (111) facets of Pt.

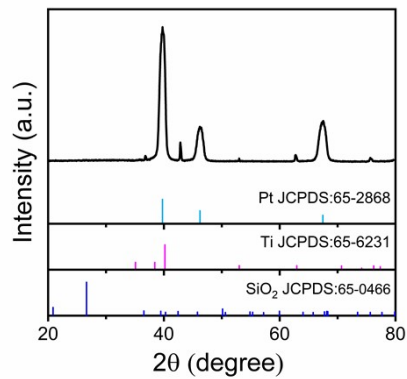

**Figure S5.** Grazing incident x-ray diffraction (GIXRD) patterns of Pt/SnO<sub>2</sub>. Notably, SnO<sub>2</sub> was deposited up to 400 cycles without exhibiting any significant peaks.

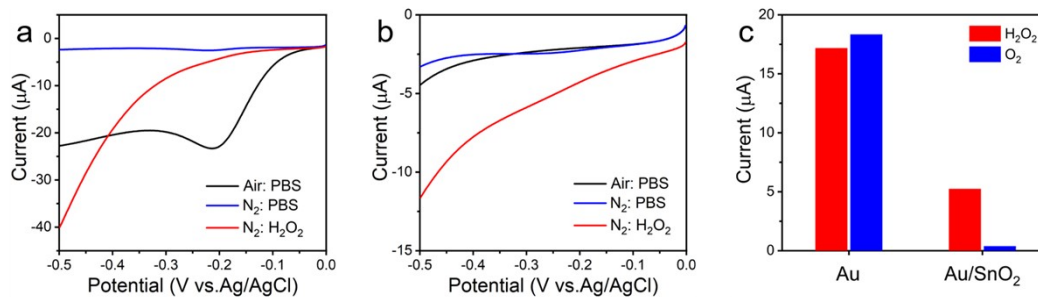

**Figure S6.** a, b) Oxygen tolerance performance of (a) Au and (b) Au/SnO<sub>2</sub>-based electrodes in the H<sub>2</sub>O<sub>2</sub> reduction reaction. LSVs curves for Au and Au/SnO<sub>2</sub> are presented in nitrogen-saturated PBS solution (black curves), air-equilibrated PBS solution (blue curves) and nitrogen-saturated H<sub>2</sub>O<sub>2</sub> PBS solution (red curves). c) Histogram of the oxygen reduction current ( $\Delta i_{O_2}$ , blue columns) and the peroxide reduction current ( $\Delta i_{H_2O_2}$ , red columns) of Pt/SnO<sub>2</sub> within different cycles of SnO<sub>2</sub> ALD.

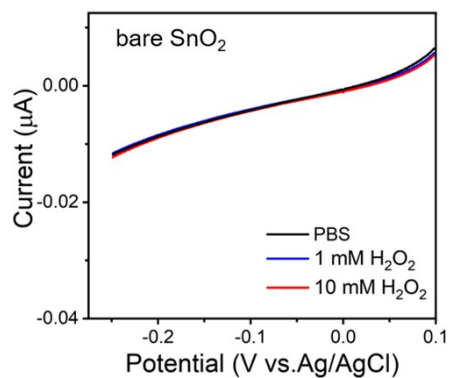

**Figure S7.** The current response to 1 mM and 10 mM H<sub>2</sub>O<sub>2</sub> when SnO<sub>2</sub> deposited on Si substrate directly without Pt.

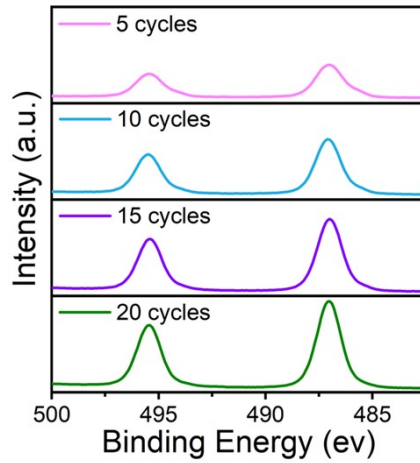

**Figure S8.** XPS analysis for Sn 3d spectra of SnO<sub>2</sub> for 5, 10, 15 and 20 ALD cycles.

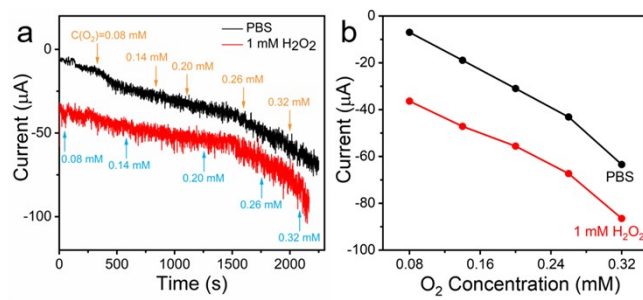

**Figure S9.** a) Current responses of the Pt based electrode in blank PBS and PBS containing  $1 \times 10^{-3}$  M of H<sub>2</sub>O<sub>2</sub> with varying oxygen concentrations. b) The currents of Pt based electrode at certain oxygen levels.

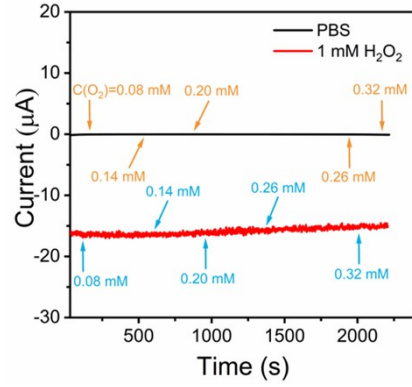

**Figure S10.** Current responses of the Pt/ SnO<sub>2</sub> based electrode in blank PBS and PBS containing  $1 \times 10^{-3}$  M of H<sub>2</sub>O<sub>2</sub> with varying oxygen concentrations.

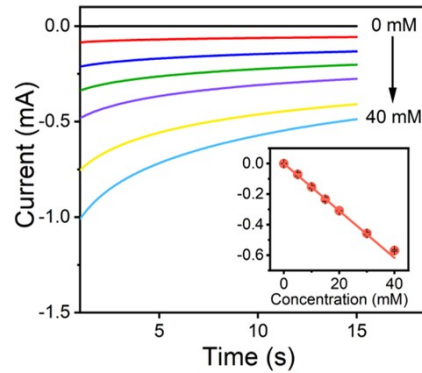

**Figure S11.** Amperometric responses with different H<sub>2</sub>O<sub>2</sub> concentrations ranging from 0 to 40 mM in PBS solution. The inset is the corresponding calibrated curves at 10 s.

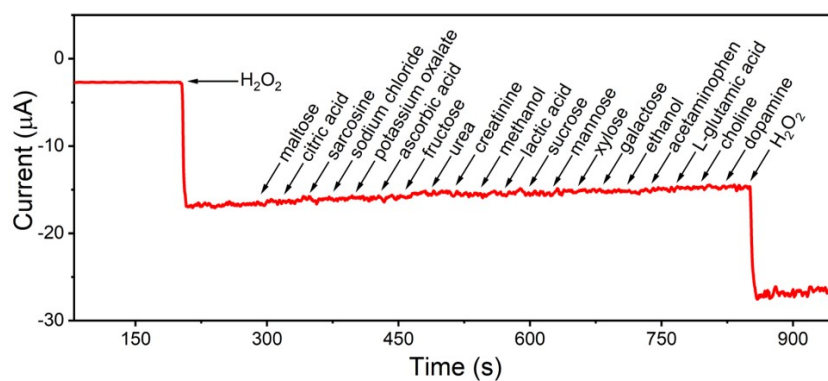

**Figure S12.** Amperometric responses of the Pt/SnO<sub>2</sub>-based electrode upon addition of 1 mM H<sub>2</sub>O<sub>2</sub> followed by 1 mM interferences, including maltose, citric acid, sarcosine, sodium chloride, potassium oxalate, ascorbic acid, fructose, urea, creatinine, methanol, lactic acid, sucrose, mannose, xylose, galactose, ethanol, acetaminophen, L-glutamic acid, choline, dopamine.

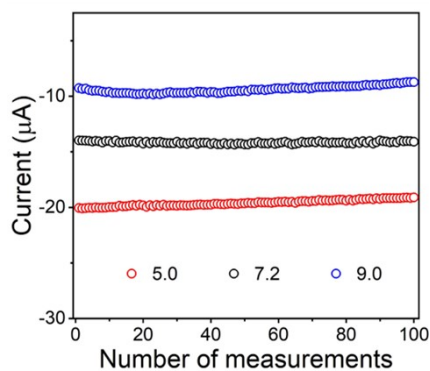

**Figure S13.** Stability tests of electrolytes with pH values of 5.0, 7.2, and 9.0 for 100 measurements.

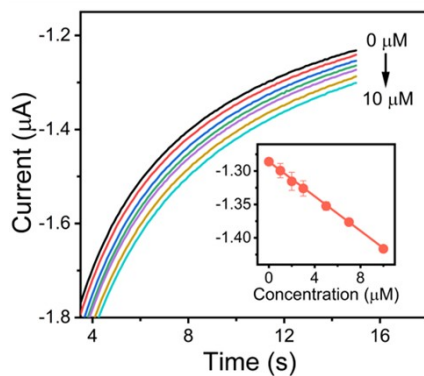

**Figure S14.** Amperometric responses with low concentration glucose concentrations ranging from 0 to 10  $\mu\text{M}$  in PBS solution.

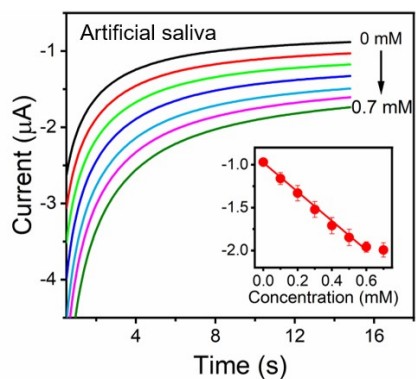

**Figure S15.** Amperometric responses with different glucose concentrations ranging from 0 to 0.7 mM in undiluted artificial saliva. The inset illustrates the calibration curve at 10 s.



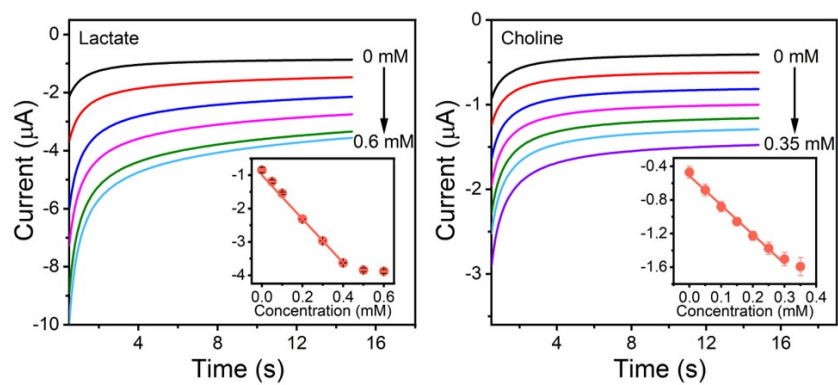

**Figure S16.** Amperometric responses of Pt/SnO<sub>2</sub>-based enzyme electrodes in lactate and choline respectively. Insets show the calibrated curves at 10 s.

**Table S1** Comparison of analytical features of the Pt/SnO<sub>2</sub> sensing platform and other sensing platforms for the electrochemical detection of hydrogen peroxide.

| Catalysts                           | V <sub>applied</sub> vs. Ag/AgCl(V) | Sensitivity (μA·mM <sup>-1</sup> ·cm <sup>-2</sup> ) | Linear range (μM) | LOD(μM) | Ref.      |
|-------------------------------------|-------------------------------------|------------------------------------------------------|-------------------|---------|-----------|
| NGQD@NC@Pd                          | 0                                   | 590                                                  | Up to 1400        | 0.02    | 1         |
| Pt@Co/MoN                           | -0.25                               | Not mentioned                                        | 0.6-979           | 0.313   | 2         |
| AuNFs/(PEI/PAA)/GR/GCE              | -0.4                                | 507.5                                                | 5-5000            | 4.5     | 3         |
| Co <sub>9</sub> S <sub>8</sub> @CuS | -0.2                                | 411.74                                               | 50–14000          | 6.06    | 4         |
| A-Co@N/G                            | -0.3                                | 3428.57                                              | 5-5375            | 0.17    | 5         |
| Se/P@N-CNBS/CNFs                    | -0.6                                | 120.3                                                | 5-40000           | 1       | 6         |
| Pt/SnO <sub>x</sub>                 | -0.05                               | 27.2                                                 | 0.5-80000         | 0.5     | 7         |
| Pt/SnO <sub>2</sub>                 | -0.2                                | 59.2                                                 | 0.1-40000         | 0.1     | This work |

## References

- 1 J. Xi, C. Xie, Y. Zhang, L. Wang, J. Xiao, X. Duan, J. Ren, F. Xiao and S. Wang, *ACS Appl. Mater. Interfaces*, 2016, **8**, 22563–22573.
- 2 J. Liu, X. Li, L. Cheng, J. Sun, X. Xia, X. Zhang, Y. Song, D. Sun, J. Sun and L. Zhang, *Chem. Commun.*, 2023, **59**, 474–477.
- 3 L. Zhang, Y. Wang, Y. Wang, M. Guo, Z. Li, X. Jin and H. Du, *Talanta*, 2023, **261**, 124600.
- 4 C. Zhang, Y. Li, H. Wang, X. Niu, D. Deng, X. Qin, X. Yan, H. He and L. Luo, *Microchem. J.*, 2022, **183**, 108037.
- 5 J. Li, J. Wu, F. Shi, M. Wang, Z. Zou, Z. Lu, L. Dai and C. M. Li, *Chem. Eng. J.*, 2025, **508**, 160786.
- 6 W. Zhou, S. Huang and C. Sun, *Int. J. Hydrog. Energy*, 2022, **47**, 14906–14915.
- 7 Z. Ding, D. Wang, L. Chen, H. Zhou, X. Zhang, X. Feng and L. Jiang, *Adv. Mater. Interfaces*, 2022, **9**, 2102163.
